# Supplementary material
Source: publisher figshare collection journal article supplement (https://acs.figshare.com/ndownloader/files/5671533)
Supplement: Supplementary file 1 [file 5671533]

### Inhibition by h19 of complex formation with h37 DNA

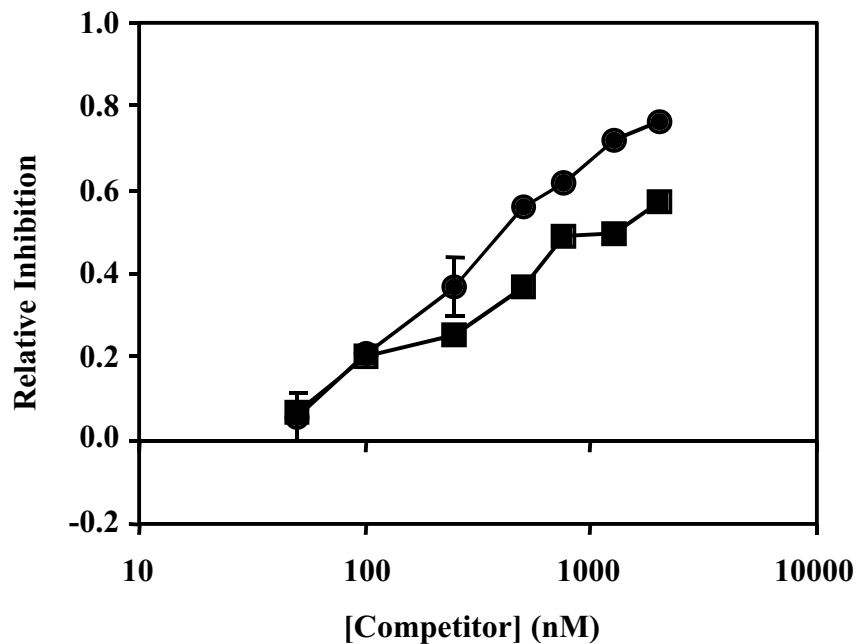

Relative inhibition of complex formation with 37 bp hmU-containing DNA (h37), calculated as described for Figure 7, is plotted as a function of the concentration of the 19 bp hmU-containing competitor DNA (h19). (●) Wild-type TF1 (5 nM); (■) TF1-K3Q (25 nM). The concentration of h37 was 5 nM. Experiments were performed at 4°C.
